# Supplementary material for: SLFinder, a pipeline for the novel identification of splice-leader sequences: a good enough solution for a complex problem
Source: BMC Bioinformatics. 2020 Jul 8;21:293. doi: 10.1186/s12859-020-03610-6 (PMC7346339; doi:10.1186/s12859-020-03610-6)
Supplement: Supplementary file 2 — Additional file 2: Supplementary Table 2. Basic descriptors of the analyzed datasets. Data Set, GenBank SRA ID, N° Reads, N° Trimmed Reads, Assembled Bases, Total Transcripts, N50, Median Contig Length, Average Contig Length, Genes predicted by Trinity (Trinity Genes) and GC content. [file 12859_2020_3610_MOESM2_ESM.xlsx]

## Sheet: Supplementary Table 2
Supplementary Table 2
Basic quality metrics for the input RNAseq data (8 datasets).
Data Set	SRA ID	Nº Reads	Nº Trimmed Reads	Assembled Bases	Total Transcripts	N50	Median Contig Length	Average Contig Lenght	"Trinity Genes"	GC content
A. aerophoba	ERR2560039	34654821	29702583	98353825	109976	1750	416	894.32	71071	48.83
	ERR2560040	16582643	14507068	64299372	70747	1684	440	908.86	47654	49.76
	ERR2560041	17737485	14474518	67717385	78356	1624	415	864.23	54506	50.07
	ERR2560042	21037623	17890125	67940282	75522	1691	435	899.61	50148	49.38
	ERR2560043	17219901	13886353	74624384	81553	1717	441	915.04	53035	49.56
	ERR2560044	10510618	8896580	50541360	57404	1587	446	880.45	40792	49.97
	ERR2560045	15097829	10808324	62637350	68670	1666	451	912.15	45118	49.77
	ERR2560046	9869700	7586525	56685985	63437	1561	465	893.58	42469	49.60
	ERR2560047	16783933	14517500	65665120	82068	1452	400	800.13	61073	50.78
C. elegans	SRR1727796	23296814	20181501	29798500	23739	1958	837	1255.26	19250	41.90
	SRR1727797	19246188	15350435	27462571	22698	1900	788	1209.91	18774	42.08
	SRR1727798	33874974	27218151	31887286	25213	1980	847	1264.72	20293	41.87
	SRR1727799	34898434	30431900	31228182	25259	1962	799	1236.32	20335	41.79
	SRR1727800	28871680	19991483	28546661	23201	1953	785	1230.41	19218	41.97
	SRR1727801	24833518	17366801	26907331	22283	1906	780	1207.53	18650	42.06
C. intestinalis	SRR5888437	16968470	15994297	69706117	46288	2793	836	1505.92	28099	40.02
	SRR5888438	19075396	17958419	79048178	53728	2797	761	1471.27	31997	39.67
	SRR5888439	17680854	16438350	72064079	48804	2752	791	1476.6	29655	39.90
D.melanogaster	SRR3390479	33305499	28821407	91562291	45906	4222	941	1994.56	30371	47.49
	SRR3390480	26332294	22862326	83001610	42284	4068	957	1962.96	28356	47.62
	SRR3390481	33587499	28895148	87465022	43491	4169	992	2011.11	28617	47.64
	SRR3390484	27199285	23386585	80941827	41193	4087	955	1964.94	27896	47.60
H. vulgaris	SRR8089745	25253058	22067472	47259873	54149	1503	465	872.77	42091	32.85
	SRR8089746	28166854	23933085	51555826	55456	1645	477	929.67	42028	32.68
	SRR8089747	22485481	15647148	49579825	61564	1419	404	805.34	50731	33.35
	SRR8089748	26104489	21620363	65601852	84688	1281	423	774.63	69841	34.86
	SRR8089749	27115966	22958104	47611165	42528	1470	460	861.37	55274	32.87
M. musculus	SRR3452302	33426457	32269187	79728649	70795	2473	478	1126.19	57164	47.35
	SRR3452303	32938732	31886108	76166680	68682	2425	469	1108.98	55530	47.42
S. glomerata	SRR7781179	79209388	75969916	261848785	272098	1889	441	962.33	115342	38.33
S. mansoni	SRR1020297	19240675	18277097	56109646	51870	2175	493	1081.74	37968	34.96
	SRR1020298	18946080	18002004	94768733	92224	2268	429	1027.59	68461	34.94
