# Supplementary material for: SLFinder, a pipeline for the novel identification of splice-leader sequences: a good enough solution for a complex problem
Source: BMC Bioinformatics. 2020 Jul 8;21:293. doi: 10.1186/s12859-020-03610-6 (PMC7346339; doi:10.1186/s12859-020-03610-6)
Supplement: Supplementary file 3 — Additional file 3: Supplementary Table 3. Hook hits obtained for each dataset (Step 1 - F in Fig. 1). Hit counts according to position and orientation in the contig, coi score and observation count cutoff (occ) are indicated. Selected Best Hooks are highlighted in bold. Results for C. intestinalis include those obtained with default and custom values (see main text). [file 12859_2020_3610_MOESM3_ESM.xlsx]

## Sheet: Supplementary Table 3
Supplementary Table 3
Hook hits obtained for each dataset (Step 1 - F in Figure 1). Hit counts according to position and orientation in contig, coi score and observation count cutoff (occ) are indicated. Selected Best Hooks are highlighted in bold. Results for C. intestinalis include those obtained with default and custom values (see main text).
Dataset	Hook ID	Start-Forward	Start-Reverse	End-Forward	End-Reverse	coi	Total Observations	occ
A. aerophoba	a1-166	145	318	237	160	0.29	860	766
	a11-81	203	119	140	230	0.25	692
	a12-73	42	24	30	61	0.31	157
	a13-40	98	321	265	82	0.53	766
	a21-2604	263	268	231	362	0.11	1124
	a2-489	181	0	0	171	1	352
	a6-85	192	181	216	179	0.03	768
	a7-108	0	140	77	0	1.00	217
	a8-140	132	303	320	124	0.42	879
	a9-66	11	2	9	3	0.12	25
C. elegans	a10-178	1	68	150	3	0.96	222	94
	a11-1448	0	194	489	1	1.00	684
	a14-50	0	15	49	9	0.75	73
	a18-82	1	33	54	2	0.93	90
	a1-9915	1476	4	5	3793	1.00	5278
	a22-33	15	45	40	10	0.55	110
	a27-96	0	26	54	0	1.00	80
	a29-19	27	23	24	20	0.00	94
	a30-10	32	10	5	30	0.61	77
	a53-148	34	0	4	72	0.93	110
	a54-42	0	17	43	2	0.94	62
	a6-153	112	22	19	118	0.70	271
	a9-68	0	0	3	0	1.00	3
C. intestinalis	a11-16	53	40	40	51	0.13	184	330
Default	a1-15	68	10	2	74	0.84	154
	a12-34	128	271	223	116	0.34	738
	a13-92	192	194	144	209	0.09	739
	a14-151	107	4	12	99	0.86	222
	a15-32	75	93	73	65	0.09	306
	a16-50	32	119	89	56	0.40	296
	a17-418	582	482	487	601	0.10	2152
	a18-53	125	97	82	78	0.06	382
	a19-26	31	27	21	14	0.03	93
	a20-31	182	121	127	143	0.14	573
	a2-166	337	271	255	312	0.10	1175
	a22-94	45	2	3	74	0.92	124
	a23-74	71	109	143	70	0.28	393
	a24-27	29	19	26	36	0.18	110
	a25-96	419	245	253	404	0.25	1321
	a26-34	70	3	3	55	0.91	131
	a27-83	134	296	325	133	0.40	888
	a28-32	24	42	34	58	0.04	158
	a29-70	839	161	191	751	0.64	1942
	a30-28	358	54	79	314	0.67	805
	a31-75	218	94	99	226	0.39	637
	a33-24	2	28	54	4	0.86	88
	a34-16	44	48	36	54	0.08	182
	a3-53	3	79	82	2	0.94	166
	a35-38	73	197	158	72	0.42	500
	a36-75	162	207	188	137	0.14	694
	a4-24	24	45	36	38	0.13	143
	a5-68	120	79	74	104	0.18	377
	a6-662	1339	931	826	1201	0.18	4297
	a7-20	121	48	65	96	0.32	330
	a8-50	46	15	32	34	0.26	127
	a9-35	20	31	60	7	0.54	118
C. intestinalis	a100-44	56	126	100	75	0.27	357	1
Custom	a10-129	194	192	209	144	0.09	739
	a102-65	146	127	83	123	0.12	479
	a103-48	79	3	2	82	0.94	166
	a104-33	113	296	242	126	0.38	777
	a105-63	60	31	69	54	0.07	214
	a107-25	23	11	9	11	0.26	54
	a113-38	25	23	11	18	0.12	77
	a11-43	7	29	34	20	0.40	90
	a116-62	15	25	19	15	0.19	74
	a118-34	16	25	22	14	0.22	77
	a122-52	42	32	37	48	0.13	159
	a12-36	2	44	38	8	0.78	92
	a128-17	6	11	16	19	0.04	52
	a13-25	15	29	17	12	0.26	73
	a132-77	189	125	106	233	0.29	653
	a14-33	14	49	25	14	0.45	102
	a1-493	1593	729	704	1408	0.35	4434
	a15-94	41	139	103	63	0.40	346
	a17-44	49	67	61	61	0.08	238
	a18-31	35	46	45	43	0.08	169
	a19-56	79	25	45	65	0.35	214
	a2-156	273	358	326	264	0.12	1221
	a22-76	147	371	360	150	0.42	1028
	a24-27	6	25	31	7	0.62	69
	a25-70	180	197	197	131	0.12	705
	a26-49	209	465	378	191	0.36	1243
	a27-32	67	59	42	83	0.20	251
	a28-47	31	10	11	30	0.49	82
	a30-27	19	26	36	11	0.35	92
	a3-102	144	312	256	131	0.35	843
	a31-77	58	53	26	37	0.09	174
	a33-100	168	226	150	152	0.08	696
	a36-27	36	4	9	53	0.75	102
	a37-111	323	108	130	293	0.44	854
	a39-28	15	19	11	7	0.15	52
	a40-82	84	102	81	72	0.08	339
	a41-27	35	20	13	32	0.34	100
	a4-29	96	49	49	68	0.25	262
	a43-70	64	4	10	74	0.82	152
	a47-111	40	11	8	35	0.60	94
	a48-101	377	57	76	344	0.69	854
	a49-80	235	213	149	166	0.05	763
	a50-68	80	200	213	95	0.40	588
	a5-133	2	44	56	0	0.96	102
	a58-31	21	8	23	9	0.02	61
	a6-34	65	41	29	42	0.21	177
	a64-284	484	580	597	487	0.10	2148
	a66-32	23	32	66	10	0.50	131
	a67-41	2	31	63	4	0.88	100
	a68-160	127	734	656	162	0.66	1679
	a69-58	5	11	11	7	0.29	34
	a70-24	16	16	22	16	0.09	70
	a71-124	101	235	254	110	0.40	700
	a7-126	291	394	330	308	0.09	1323
	a72-118	110	161	136	101	0.17	508
	a73-46	18	30	39	22	0.27	109
	a74-30	25	20	11	26	0.24	82
	a75-22	31	1	3	36	0.89	71
	a76-51	11	24	14	8	0.33	57
	a77-73	450	262	266	358	0.21	1336
	a79-81	58	54	42	37	0.01	191
	a80-80	38	22	20	20	0.16	100
	a83-109	135	527	436	171	0.52	1269
	a84-45	19	24	15	14	0.08	72
	a85-32	26	41	35	26	0.19	128
	a86-212	277	132	129	316	0.39	854
	a87-48	2	45	74	3	0.92	124
	a8-79	14	39	24	23	0.26	100
	a88-99	111	171	149	121	0.16	552
	a90-56	73	37	35	82	0.37	227
	a91-109	4	107	99	12	0.86	222
	a92-63	25	26	13	18	0.05	82
	a93-31	2	1	0	5	0.75	8
	a94-36	60	58	48	29	0.09	195
	a9-50	157	60	63	165	0.45	445
	a95-93	73	81	98	51	0.18	303
	a96-29	10	67	75	2	0.84	154
	a97-39	3	70	55	3	0.91	131
	a98-72	122	149	131	84	0.15	486
	a99-141	401	222	243	388	0.26	1254
D. melanogaster	a10-28	27	38	46	29	0.20	140	140
	a3-53	18	158	113	23	0.74	312
	a4-53	45	0	0	28	1.00	73
	a5-627	244	177	193	199	0.09	813
	a6-66	56	83	81	80	0.09	300
	a7-127	8	13	10	12	0.07	43
	a8-43	0	0	2	0	1.00	2
H. vulgaris	a106-174	6	0	1	1	0.75	8	769
	a15-5259	0	455	262	0	1.00	717
	a16-5881	0	1667	1690	0	1.00	3357
	a18-34	2	26	14	0	0.90	42
	a19-11201	0	996	712	0	1.00	1708
	a21-476	0	188	124	0	1.00	312
	a24-745	1	262	265	3	0.98	531
	a2-86372	31536	0	2	20739	1.00	52277
	a3-3848	495	0	0	345	1.00	840
	a53-3027	467	0	0	302	1.00	769
	a8-4794	483	0	0	291	1.00	774
M. musculus	a10-1241	104	954	743	133	0.75	1934	936
	a1-1217	1355	715	864	1096	0.22	4030
	a11-602	88	646	463	88	0.73	1285
	a13-413	790	93	120	627	0.74	1630
	a14-65	191	41	50	208	0.63	490
	a15-607	100	313	405	86	0.59	904
	a16-741	238	247	287	260	0.03	1032
	a18-605	579	77	91	407	0.71	1154
	a19-10600	11	8	5	5	0.10	29
	a20-50	66	4	21	72	0.69	163
	a2-319	315	119	115	255	0.42	804
	a24-34	28	418	319	28	0.86	793
	a25-64	45	241	315	58	0.69	659
	a29-345	43	113	135	41	0.49	332
	a32-124	3	1	4	2	0.00	10
	a3-558	287	712	758	273	0.45	2030
	a4-387	129	382	284	141	0.42	936
	a5-456	369	131	115	373	0.50	988
	a6-536	266	26	35	328	0.81	655
	a7-341	470	61	82	503	0.74	1116
	a8-556	127	374	488	127	0.54	1116
	a9-182	319	53	74	425	0.71	871
S. glomerata	a1-1155	61	752	681	61	0.84	1555	552
	a2-375	257	15	26	248	0.85	546
	a3-154	163	122	158	172	0.09	615
	a4-336	6	153	154	6	0.92	319
	a5-559	305	19	16	212	0.87	552
	a6-462	93	548	525	83	0.72	1249
	a7-153	19	124	152	28	0.71	323
S. mansoni	a10-178	152	262	336	132	0.36	882	411
	a11-145	71	132	127	81	0.26	411
	a1-193	116	29	26	121	0.62	292
	a12-691	559	126	125	590	0.64	1400
	a13-278	100	225	186	99	0.35	610
	a14-168	187	28	30	205	0.74	450
	a15-273	278	92	93	256	0.49	719
	a16-47	98	22	20	94	0.64	234
	a17-113	36	73	71	31	0.36	211
	a21-155	21	72	63	28	0.47	184
	a2-164	48	131	154	31	0.57	364
	a22-2005	0	594	1291	7	0.99	1892
	a23-34	31	40	32	61	0.12	164
	a25-161	119	84	55	122	0.27	380
	a26-157	58	196	263	46	0.63	563
	a27-83	46	28	12	48	0.40	134
	a28-106	76	122	99	61	0.23	358
	a29-166	74	16	14	63	0.64	167
	a30-236	233	82	72	258	0.52	645
	a31-33	65	19	34	52	0.38	170
	a3-341	88	411	448	81	0.67	1028
	a33-61	48	9	10	55	0.69	122
	a34-117	50	153	169	39	0.57	411
	a37-88	169	35	31	139	0.65	374
	a4-359	183	51	43	197	0.60	474
	a5-293	232	86	86	247	0.47	651
	a6-105	34	95	144	31	0.57	304
	a7-34	65	44	39	43	0.13	191
	a8-484	367	94	90	366	0.60	917
	a9-579	672	261	251	634	0.44	1818
