# Supplementary material for: SLFinder, a pipeline for the novel identification of splice-leader sequences: a good enough solution for a complex problem
Source: BMC Bioinformatics. 2020 Jul 8;21:293. doi: 10.1186/s12859-020-03610-6 (PMC7346339; doi:10.1186/s12859-020-03610-6)
Supplement: Supplementary file 4 — Additional file 4: Supplementary Table 4. Putative SLs loci identified by SLFinder in the C. elegans dataset. Previously reported SL-RNAs are also indicated. [file 12859_2020_3610_MOESM4_ESM.xlsx]

## Sheet: Supplementary Table 4
Supplementary Table 4
Putuative SL loci identified by SLFinder in the C. elegans dataset. Previously reported SLs are indicated under column SL-RNA gen ID according to the genome annotation. Locus, Scaffold, Position, N° of Matching Hook Variants, presence of potential donor site, pSL sequence ID, and annotated protein-coding genes closer than 100 pb are indicated. Potential donor sites are reported as “Clear” when cl…
Locus	Scaffold	Position	N° Matchng Hook Variants	Potential donor site	pSL ID	SL-RNA gene ID	Observations
Locus-1	I	8781698..8781718	10	Clear	Celegans_pSL-7
Locus-2	I	9055239..9055262	16	Clear*	Celegans_pSL-1	sls-2.6	Minor overlap of the Hook Variants with the Donor Site
Locus-3	I	9057976..9057999	16	Clear*	Celegans_pSL-1	sls-2.7	Minor overlap of the Hook Variants with the Donor Site
Locus-4	I	11709194..11709214	7	Clear	Celegans_pSL-8
Locus-5	III	2431008..2431032	10	Not Found
Locus-6	III	7140530..7140553	16	Clear*	Celegans_pSL-1	sls-2.5	Minor overlap of the Hook Variants with the Donor Site
Locus-7	III	7142291..7142312	1	Clear	Celegans_pSL-3	sls-2.18
Locus-8	III	11090500..11090523	14	Clear*	Celegans_pSL-2	sls-2.14	Minor overlap of the Hook Variants with the Donor Site
Locus-9	III	11091010..11091031	1	Clear	Celegans_pSL-4	sls-2.15
Locus-10	IV	5063510..5063531	1	Clear	Celegans_pSL-5	sls-2.13
Locus-11	IV	5261913..5261934	1	Clear	Celegans_pSL-5	sls-2.12
Locus-12	V	4573963..4573983	10	Clear*	Celegans_pSL-7		Detected Donor Site overlap last base of the predicted SL. SL hit is followed by a short repeat of the 3' SL-1.
Locus-13	V	17118156..17118176	26	Unclear	Celegans_pSL-7	sls-1.12
Locus-14	V	17120769..17120789	26	Unclear	Celegans_pSL-7	sls-1.10
Locus-15	V	17121745..17121765	26	Unclear	Celegans_pSL-7	sls-1.11
Locus-16	V	17122725..17122745	26	Unclear	Celegans_pSL-7	sls-1.9
Locus-17	V	17123701..17123721	26	Unclear	Celegans_pSL-7	sls-1.8
Locus-18	V	17124673..17124693	26	Unclear	Celegans_pSL-7	sls-1.7
Locus-19	V	17125649..17125669	26	Unclear	Celegans_pSL-7	sls-1.6
Locus-20	V	17128209..17128230	10	Clear	Celegans_pSL-6		SL hit is followed by two partial repeats of SL-1
Locus-21	V	17129181..17129201	26	Unclear	Celegans_pSL-7	sls-1.4
Locus-22	V	17130163..17130183	26	Unclear	Celegans_pSL-7	sls-1.3
Locus-23	V	17131139..17131159	26	Unclear	Celegans_pSL-7	sls-1.2
Locus-24	V	17428712..17428732	9	Clear	Celegans_pSL-7
Locus-25	X	14966803..14966828	1	Manually Identified	Celegans_pSL-9		Rare putative variant of SL-1
Locus-26	X	17018588..17018615	1	Manually Identified	Celegans_pSL-10		Rare putative variant of SL-1
