# Supplementary material for: SLFinder, a pipeline for the novel identification of splice-leader sequences: a good enough solution for a complex problem
Source: BMC Bioinformatics. 2020 Jul 8;21:293. doi: 10.1186/s12859-020-03610-6 (PMC7346339; doi:10.1186/s12859-020-03610-6)
Supplement: Supplementary file 10 — Additional file 10: Supplementary Table 7. Putative SL loci identified by SLFinder in the S. mansoni dataset using Wormbase’s genome assembly as reference (WBPS). Annotated protein-coding genes closer than 100 bp are indicated. [file 12859_2020_3610_MOESM10_ESM.xlsx]

## Sheet: Supplementary Table 7
Supplementary Table 7
Putuative SL loci identified by SLFinder in the S. mansoni dataset using Wormbase’s genome assembly as reference. Locus, Scaffold, Position, N° of Matching Hook Variants, presence of potential donor site, pSL sequence ID, and annotated protein-coding genes closer than 100 pb are indicated. Potential donor sites are reported as “Clear” when clearly identified, "Not Found" if no GT was found after …
Locus	Scaffold	Position	N° matchng Hook Variants	Potential donor site	pSL ID	Protein-coding gene ID	Observations
Locus-1	SM_V7_1	13778873..13778897	2	Clear	Smansoni_pSL-2	Smp_123830.1	Rare and divergent SL variant. Modified terminal ATG.
Locus-2	SM_V7_1	73112469..73112494	4	Clear	Smansoni_pSL-1
Locus-3	SM_V7_2	4271686..4271711	4	Clear	Smansoni_pSL-1	Smp_001210
Locus-4	SM_V7_2	28446110..28446135	4	Clear	Smansoni_pSL-1	Smp_105420
Locus-5	SM_V7_2	40684393..40684418	4	Not Found
Locus-6	SM_V7_2	40733653..40733678	4	Not Found
Locus-7	SM_V7_2	40931935..40931960	4	Not Found
Locus-8	SM_V7_2	41044171..41044196	4	Not Found
Locus-9	SM_V7_2	45257837..45257862	4	Clear	Smansoni_pSL-1	Smp_170980
Locus-10	SM_V7_3	1126504..1126529	4	Clear	Smansoni_pSL-1
Locus-11	SM_V7_3	16493916..16493941	4	Clear	Smansoni_pSL-1
Locus-12	SM_V7_5	6379852..6379877	4	Clear	Smansoni_pSL-1
Locus-13	SM_V7_5	13932347..13932372	4	Clear	Smansoni_pSL-1
Locus-14	SM_V7_5	13936752..13936777	4	Clear	Smansoni_pSL-1
Locus-15	SM_V7_6	2011984..2012008	3	Clear	Smansoni_pSL-3	Smp_162180
Locus-16	SM_V7_6	6847410..6847435	4	Clear	Smansoni_pSL-1	Smp_162180	Cluster of SL loci.
Locus-17	SM_V7_6	6848013..6848038	4	Clear	Smansoni_pSL-1	Smp_162180	Cluster of SL loci.
Locus-18	SM_V7_6	6848615..6848640	4	Clear	Smansoni_pSL-1	Smp_162180	Cluster of SL loci.
Locus-19	SM_V7_6	6849218..6849243	4	Clear	Smansoni_pSL-1	Smp_162180	Cluster of SL loci.
Locus-20	SM_V7_6	6849821..6849846	4	Clear	Smansoni_pSL-1	Smp_162180	Cluster of SL loci.
Locus-21	SM_V7_6	6879575..6879600	4	Clear	Smansoni_pSL-1		Cluster of SL loci.
Locus-22	SM_V7_6	6880179..6880204	4	Clear	Smansoni_pSL-1		Cluster of SL loci.
Locus-23	SM_V7_6	6880782..6880807	4	Clear	Smansoni_pSL-1		Cluster of SL loci.
Locus-24	SM_V7_6	6881384..6881409	4	Clear	Smansoni_pSL-1		Cluster of SL loci.
Locus-25	SM_V7_6	6881988..6882013	4	Clear	Smansoni_pSL-1		Cluster of SL loci.
Locus-26	SM_V7_6	6882572..6882597	4	Clear	Smansoni_pSL-1		Cluster of SL loci.
Locus-27	SM_V7_6	6883174..6883199	4	Clear	Smansoni_pSL-1		Cluster of SL loci.
Locus-28	SM_V7_6	6883775..6883800	4	Clear	Smansoni_pSL-1		Cluster of SL loci.
Locus-29	SM_V7_6	6884378..6884403	4	Clear	Smansoni_pSL-1		Cluster of SL loci.
Locus-30	SM_V7_6	6884981..6885006	4	Clear	Smansoni_pSL-1		Cluster of SL loci.
Locus-31	SM_V7_6	6885584..6885609	4	Clear	Smansoni_pSL-1		Cluster of SL loci.
Locus-32	SM_V7_6	6886187..6886212	4	Clear	Smansoni_pSL-1		Cluster of SL loci.
Locus-33	SM_V7_6	6886790..6886815	4	Clear	Smansoni_pSL-1		Cluster of SL loci.
Locus-34	SM_V7_6	6887393..6887418	4	Clear	Smansoni_pSL-1		Cluster of SL loci.
Locus-35	SM_V7_6	6887996..6888021	4	Clear	Smansoni_pSL-1		Cluster of SL loci.
Locus-36	SM_V7_6	6888599..6888624	4	Clear	Smansoni_pSL-1		Cluster of SL loci.
Locus-37	SM_V7_6	6889202..6889227	4	Clear	Smansoni_pSL-1		Cluster of SL loci.
Locus-38	SM_V7_6	6889805..6889830	4	Clear	Smansoni_pSL-1		Cluster of SL loci.
Locus-39	SM_V7_6	6890408..6890433	4	Clear	Smansoni_pSL-1		Cluster of SL loci.
Locus-40	SM_V7_6	6891011..6891036	4	Clear	Smansoni_pSL-1		Cluster of SL loci.
Locus-41	SM_V7_6	6891614..6891639	4	Clear	Smansoni_pSL-1		Cluster of SL loci.
Locus-42	SM_V7_6	6892217..6892242	4	Clear	Smansoni_pSL-1		Cluster of SL loci.
Locus-43	SM_V7_6	6892820..6892845	4	Clear	Smansoni_pSL-1		Cluster of SL loci.
Locus-44	SM_V7_6	6893423..6893448	4	Clear	Smansoni_pSL-1		Cluster of SL loci.
Locus-45	SM_V7_6	6894026..6894051	4	Clear	Smansoni_pSL-1		Cluster of SL loci.
Locus-46	SM_V7_6	6894629..6894654	4	Clear	Smansoni_pSL-1		Cluster of SL loci.
Locus-47	SM_V7_6	6895232..6895257	4	Clear	Smansoni_pSL-1		Cluster of SL loci.
Locus-48	SM_V7_6	6895835..6895860	4	Clear	Smansoni_pSL-1		Cluster of SL loci.
Locus-49	SM_V7_6	6896438..6896463	4	Clear	Smansoni_pSL-1		Cluster of SL loci.
Locus-50	SM_V7_6	6897041..6897066	4	Clear	Smansoni_pSL-1		Cluster of SL loci.
Locus-51	SM_V7_6	6897644..6897669	4	Clear	Smansoni_pSL-1		Cluster of SL loci.
Locus-52	SM_V7_6	6898247..6898272	4	Clear	Smansoni_pSL-1		Cluster of SL loci.
Locus-53	SM_V7_6	6898850..6898875	4	Clear	Smansoni_pSL-1		Cluster of SL loci.
Locus-54	SM_V7_6	6899453..6899478	4	Clear	Smansoni_pSL-1		Cluster of SL loci.
Locus-55	SM_V7_6	6900056..6900081	4	Clear	Smansoni_pSL-1		Cluster of SL loci.
Locus-56	SM_V7_6	6900659..6900684	4	Clear	Smansoni_pSL-1		Cluster of SL loci.
Locus-57	SM_V7_6	6901262..6901287	4	Clear	Smansoni_pSL-1		Cluster of SL loci.
Locus-58	SM_V7_6	6901865..6901890	4	Clear	Smansoni_pSL-1		Cluster of SL loci.
Locus-59	SM_V7_6	6902468..6902493	4	Clear	Smansoni_pSL-1		Cluster of SL loci.
Locus-60	SM_V7_6	6903071..6903096	4	Clear	Smansoni_pSL-1		Cluster of SL loci.
Locus-61	SM_V7_6	6903674..6903699	4	Clear	Smansoni_pSL-1		Cluster of SL loci.
Locus-62	SM_V7_6	6904277..6904302	4	Clear	Smansoni_pSL-1		Cluster of SL loci.
Locus-63	SM_V7_6	6904880..6904905	4	Clear	Smansoni_pSL-1		Cluster of SL loci.
Locus-64	SM_V7_6	6905483..6905508	4	Clear	Smansoni_pSL-1		Cluster of SL loci.
Locus-65	SM_V7_6	6906086..6906111	4	Clear	Smansoni_pSL-1		Cluster of SL loci.
Locus-66	SM_V7_6	6906689..6906714	4	Clear	Smansoni_pSL-1		Cluster of SL loci.
Locus-67	SM_V7_6	6907292..6907317	4	Clear	Smansoni_pSL-1		Cluster of SL loci.
Locus-68	SM_V7_6	6907895..6907920	4	Clear	Smansoni_pSL-1		Cluster of SL loci.
Locus-69	SM_V7_6	6908498..6908523	4	Clear	Smansoni_pSL-1		Cluster of SL loci.
Locus-70	SM_V7_6	6909101..6909126	4	Clear	Smansoni_pSL-1		Cluster of SL loci.
Locus-71	SM_V7_6	6909704..6909729	4	Clear	Smansoni_pSL-1		Cluster of SL loci.
Locus-72	SM_V7_6	6910307..6910332	4	Clear	Smansoni_pSL-1		Cluster of SL loci.
Locus-73	SM_V7_6	6910910..6910935	4	Clear	Smansoni_pSL-1		Cluster of SL loci.
Locus-74	SM_V7_6	6911513..6911538	4	Clear	Smansoni_pSL-1		Cluster of SL loci.
Locus-75	SM_V7_6	6912116..6912141	4	Clear	Smansoni_pSL-1		Cluster of SL loci.
Locus-76	SM_V7_6	6912719..6912744	4	Clear	Smansoni_pSL-1		Cluster of SL loci.
Locus-77	SM_V7_6	6913322..6913347	4	Clear	Smansoni_pSL-1		Cluster of SL loci.
Locus-78	SM_V7_6	6913925..6913950	4	Clear	Smansoni_pSL-1		Cluster of SL loci.
Locus-79	SM_V7_6	6914528..6914553	4	Clear	Smansoni_pSL-1		Cluster of SL loci.
Locus-80	SM_V7_6	6915131..6915156	4	Clear	Smansoni_pSL-1		Cluster of SL loci.
Locus-81	SM_V7_6	6915733..6915758	4	Clear	Smansoni_pSL-1		Cluster of SL loci.
Locus-82	SM_V7_6	6916336..6916361	4	Clear	Smansoni_pSL-1		Cluster of SL loci.
Locus-83	SM_V7_6	6916939..6916964	4	Clear	Smansoni_pSL-1		Cluster of SL loci.
Locus-84	SM_V7_6	6917542..6917567	4	Clear	Smansoni_pSL-1		Cluster of SL loci.
Locus-85	SM_V7_6	6918145..6918170	4	Clear	Smansoni_pSL-1		Cluster of SL loci.
Locus-86	SM_V7_6	6918748..6918773	4	Clear	Smansoni_pSL-1		Cluster of SL loci.
Locus-87	SM_V7_6	6919351..6919376	4	Clear	Smansoni_pSL-1		Cluster of SL loci.
Locus-88	SM_V7_6	6919954..6919979	4	Clear	Smansoni_pSL-1		Cluster of SL loci.
Locus-89	SM_V7_6	6920557..6920582	4	Clear	Smansoni_pSL-1		Cluster of SL loci.
Locus-90	SM_V7_6	6921160..6921185	4	Clear	Smansoni_pSL-1		Cluster of SL loci.
Locus-91	SM_V7_6	6921763..6921788	4	Clear	Smansoni_pSL-1		Cluster of SL loci.
Locus-92	SM_V7_6	6922366..6922391	4	Clear	Smansoni_pSL-1		Cluster of SL loci.
Locus-93	SM_V7_6	6922969..6922994	4	Clear	Smansoni_pSL-1		Cluster of SL loci.
Locus-94	SM_V7_6	6923572..6923597	4	Clear	Smansoni_pSL-1		Cluster of SL loci.
Locus-95	SM_V7_6	6924175..6924200	4	Clear	Smansoni_pSL-1		Cluster of SL loci.
Locus-96	SM_V7_6	6924778..6924803	4	Clear	Smansoni_pSL-1		Cluster of SL loci.
Locus-97	SM_V7_6	6925381..6925406	4	Clear	Smansoni_pSL-1		Cluster of SL loci.
Locus-98	SM_V7_6	6925984..6926009	4	Clear	Smansoni_pSL-1		Cluster of SL loci.
Locus-99	SM_V7_6	6926587..6926612	4	Clear	Smansoni_pSL-1		Cluster of SL loci.
Locus-100	SM_V7_6	6927190..6927215	4	Clear	Smansoni_pSL-1		Cluster of SL loci.
Locus-101	SM_V7_6	6927793..6927818	4	Clear	Smansoni_pSL-1		Cluster of SL loci.
Locus-102	SM_V7_6	6928396..6928421	4	Clear	Smansoni_pSL-1		Cluster of SL loci.
Locus-103	SM_V7_6	6928999..6929024	4	Clear	Smansoni_pSL-1		Cluster of SL loci.
Locus-104	SM_V7_6	6929602..6929627	4	Clear	Smansoni_pSL-1		Cluster of SL loci.
Locus-105	SM_V7_6	6930205..6930230	4	Clear	Smansoni_pSL-1		Cluster of SL loci.
Locus-106	SM_V7_6	6930808..6930833	4	Clear	Smansoni_pSL-1		Cluster of SL loci.
Locus-107	SM_V7_6	6931411..6931436	4	Clear	Smansoni_pSL-1		Cluster of SL loci.
Locus-108	SM_V7_6	6932014..6932039	4	Clear	Smansoni_pSL-1		Cluster of SL loci.
Locus-109	SM_V7_6	6932617..6932642	4	Clear	Smansoni_pSL-1		Cluster of SL loci.
Locus-110	SM_V7_6	6933220..6933245	4	Clear	Smansoni_pSL-1		Cluster of SL loci.
Locus-111	SM_V7_6	6933823..6933848	4	Clear	Smansoni_pSL-1		Cluster of SL loci.
Locus-112	SM_V7_6	6934426..6934451	4	Clear	Smansoni_pSL-1		Cluster of SL loci.
Locus-113	SM_V7_6	6935029..6935054	4	Clear	Smansoni_pSL-1		Cluster of SL loci.
Locus-114	SM_V7_6	6935632..6935657	4	Clear	Smansoni_pSL-1		Cluster of SL loci.
Locus-115	SM_V7_6	6936235..6936260	4	Clear	Smansoni_pSL-1		Cluster of SL loci.
Locus-116	SM_V7_6	6936838..6936863	4	Clear	Smansoni_pSL-1		Cluster of SL loci.
Locus-117	SM_V7_6	6937441..6937466	4	Clear	Smansoni_pSL-1		Cluster of SL loci.
Locus-118	SM_V7_6	6938044..6938069	4	Clear	Smansoni_pSL-1		Cluster of SL loci.
Locus-119	SM_V7_6	6938647..6938672	4	Clear	Smansoni_pSL-1		Cluster of SL loci.
Locus-120	SM_V7_6	6939250..6939275	4	Clear	Smansoni_pSL-1		Cluster of SL loci.
Locus-121	SM_V7_6	6939853..6939878	4	Clear	Smansoni_pSL-1		Cluster of SL loci.
Locus-122	SM_V7_6	6940456..6940481	4	Clear	Smansoni_pSL-1		Cluster of SL loci.
Locus-123	SM_V7_6	6941059..6941084	4	Clear	Smansoni_pSL-1		Cluster of SL loci.
Locus-124	SM_V7_6	6941662..6941687	4	Clear	Smansoni_pSL-1		Cluster of SL loci.
Locus-125	SM_V7_6	6942265..6942290	4	Clear	Smansoni_pSL-1		Cluster of SL loci.
Locus-126	SM_V7_6	8146345..8146370	4	Not Found
Locus-127	SM_V7_6	8171840..8171865	4	Not Found
Locus-128	SM_V7_7	3829609..3829633	1	Manually Identified	Smansoni_pSL-4		Rare and divergent SL variant. Expected donor site masked by Hook Variants extension.
Locus-129	SM_V7_ZW	28674449..28674473	3	Not Found
Locus-130	SM_V7_ZW	36383073..36383098	4	Clear	Smansoni_pSL-1	Smp_333030
Locus-131	SM_V7_ZW	50385053..50385078	4	Clear	Smansoni_pSL-1	Smp_305870
Locus-132	SM_V7_ZW	53400317..53400340	1	Not Found		Smp_025150	Only central region of the SL.
