# Supplementary material for: SLFinder, a pipeline for the novel identification of splice-leader sequences: a good enough solution for a complex problem
Source: BMC Bioinformatics. 2020 Jul 8;21:293. doi: 10.1186/s12859-020-03610-6 (PMC7346339; doi:10.1186/s12859-020-03610-6)
Supplement: Supplementary file 11 — Additional file 11: Supplementary Table 8. Putative SL loci identified by SLFinder in the S. mansoni dataset using GeneDB’s genome assembly as reference. Annotated protein-coding genes closer than 100 bp are indicated. [file 12859_2020_3610_MOESM11_ESM.xlsx]

## Sheet: Supplementary Table 8
Supplementary Table 8
Putuative SL coding Loci identified by SLFinder in the S. mansoni dataset using GeneDB’s genome assembly as reference. Locus, Scaffold, Position, N° of Matching Hook Variants, presence of potential donor site, pSL sequence ID, and annotated protein-coding genes closer than 100 pb are indicated. Potential donor sites are reported as “Clear” when clearly identified, "Not Found" if no GT was found a…
Locus	Scaffold	Position	N° Matchng Hook Variants	Potential donor site	pSL ID	SL-RNA gene ID	Protein gene ID	Observations
Locus-1	Schisto_mansoni.Chr_1	8917765..8917789	2	Clear	Smansoni_pSL-2		Smp_123830
Locus-2	Schisto_mansoni.Chr_1	57525163..57525187	3	Not Found
Locus-3	Schisto_mansoni.Chr_2	2838761..2838786	4	Clear	Smansoni_pSL-1		Smp_170980
Locus-4	Schisto_mansoni.Chr_2	15182810..15182835	4	Clear	Smansoni_pSL-1		Smp_105420
Locus-5	Schisto_mansoni.Chr_2.unplaced.SC_0332	42613..42638	4	Not Found
Locus-6	Schisto_mansoni.Chr_3	5373763..5373788	4	Clear	Smansoni_pSL-1	Smp_rajko_90nt_slRNA-1.1.1
Locus-7	Schisto_mansoni.Chr_3.unplaced.SC_0077	936368..936393	4	Clear	Smansoni_pSL-1
Locus-8	Schisto_mansoni.Chr_3.unplaced.SC_0077	943042..943067	4	Clear	Smansoni_pSL-1
Locus-9	Schisto_mansoni.Chr_5	4122485..4122510	4	Clear	Smansoni_pSL-1
Locus-10	Schisto_mansoni.Chr_6	378676..378700	3	Clear	Smansoni_pSL-3		Smp_162180
Locus-11	Schisto_mansoni.Chr_6	7123858..7123883	4	Not Found
Locus-12	Schisto_mansoni.Chr_6	7149349..7149374	4	Not Found
Locus-13	Schisto_mansoni.Chr_ZW	16217832..16217856	3	Not Found
Locus-14	Schisto_mansoni.Chr_ZW	31525400..31525425	4	Clear	Smansoni_pSL-1		Smp_244540
Locus-15	Schisto_mansoni.Chr_ZW	36429429..36429452	1	Not Found			Smp_025150
Locus-16	Schisto_mansoni.Chr_ZW	44770575..44770600	4	Clear	Smansoni_pSL-1	rajko.90nt.slRNA-45.1.1	Smp_244270
Locus-17	Schisto_mansoni.Chr_ZW	44771179..44771204	4	Clear	Smansoni_pSL-1	rajko.90nt.slRNA-46.1.1; rajko.90nt.slRNA-5.1.1	Smp_244270
Locus-18	Schisto_mansoni.SC_0097	343519..343544	4	Clear	Smansoni_pSL-1
Locus-19	Schisto_mansoni.SC_0129	880016..880041	4	Clear	Smansoni_pSL-1		Smp_212530
Locus-20	Schisto_mansoni.SC_0142	709457..709482	4	Clear	Smansoni_pSL-1	rajko.90nt.slRNA-39.1.1; rajko.90nt.slRNA-31.1.1
Locus-21	Schisto_mansoni.SC_0142	710060..710083	2	Not Found		rajko.90nt.slRNA-3.1.1		Donor site is missing in the reference assembly
Locus-22	Schisto_mansoni.SC_0201	292735..292759	1	Not Found	Smansoni_pSL-4			Rare and divergent SL variant. Expected donor site masked by Hook Variants extension.
